# Supplementary material for: Selective etching of ITO–PET using a dry film photoresist for large area metamaterial fabrication
Source: Royal Society of Chemistry journal article supplement (doi:10.1039/d4tc02547d), 2024-01-01
Supplement: d4tc02547d2.pdf [file d4tc02547d2.pdf]

### Thickness measurement of photoresist

The measured photoresist thickness of lines in Figure 6(b) in the manuscript using optical profilometry at random locations is shown in figures below.

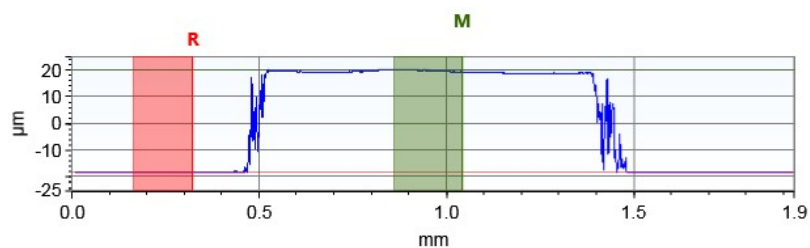

Figure 1. 950 micron line (Thickness = 38.00 micron)

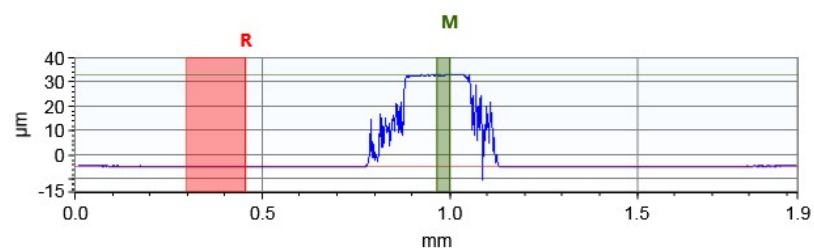

Figure 2. 250 micron line (Thickness = 37.61 micron)

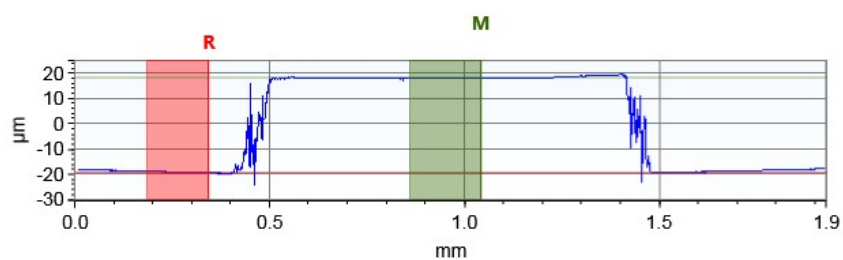

Figure 3. 1000 micron line (Thickness = 37.61 micron)

The measured photoresist thickness is very close to 38 microns which matches with the thickness as claimed by the manufacturer.
